# Supplementary material
Source: Elsevier journal article supplement (https://www.sciencedirect.com/science/article/pii/S0121812321000384)
Supplement: mmc1 [file S0121812321000384:mmc1.pdf]

## **Síndrome antifosfolípido catastrófico**

Ignasi Rodríguez-Pintó<sup>1</sup>, Brenda López-Benjume<sup>2</sup>, Gerard Espinosa<sup>2</sup> y Ricard Cervera<sup>2</sup>

<sup>1</sup>Unidad de Enfermedades Autoinmunes, Hospital Mutua de Terrassa, Terrassa,  
Cataluña, España

<sup>2</sup>Departamento de Enfermedades Autoinmunes, Hospital Clínic, Barcelona, Cataluña,  
España.

### Autor de correspondencia:

Ricard Cervera, MD, PhD, FRCP

Correo electrónico: rcervera@clinic.cat

### **Resumen**

El síndrome antifosfolípido (SAF) es una enfermedad sistémica autoinmune, caracterizada por el desarrollo de eventos trombóticos y/o morbilidad obstétrica en presencia de anticuerpos antifosfolípidos (aPL), tales como el anticoagulante lúpico (AL), los anticuerpos anticardiolipina (aCL) o anticuerpos anti-β 2- glicoproteína I (aβ 2 GPI). En 1992, Ronald A. Asherson describió una variante clínica muy agresiva de este síndrome, caracterizada por el desarrollo de múltiples manifestaciones trombóticas, de manera simultánea o dentro de un corto periodo de tiempo. Se propuso entonces el término SAF catastrófico y desde entonces se le ha conocido por ese nombre.

### **Palabras claves:**

Síndrome antifosfolípido, síndrome antifosfolípido catastrófico, anticuerpos antifosfolípidos

## **Catastrophic antiphospholipid syndrome**

### **Abstract**

The antiphospholipid syndrome (APS) is a systemic autoimmune disease characterized by the development of thrombotic events and/or obstetric morbidity in the presence of antiphospholipid antibodies (aPL), such as the lupus anticoagulant (LA), anticardiolipin antibodies (aCL) or anti- $\beta_2$ -glycoprotein I antibodies ( $\beta_2$  GPI). In 1992, Ronald A. Asherson described a very aggressive clinical variant of this syndrome characterized by the development of multiple thrombotic manifestations, simultaneously or in a short period of time. The term catastrophic APS was proposed and since then it is known by this name.

### **Keywords:**

Antiphospholipid syndrome, catastrophic antiphospholipid syndrome, antiphospholipid antibodies

## **INTRODUCCIÓN**

El síndrome antifosfolípido (SAP) es una enfermedad sistémica autoinmune, caracterizada por el desarrollo de eventos trombóticos y/o morbilidad obstétrica, en presencia de anticuerpos antifosfolípidos (aPL), tales como anticoagulante lúpico (AL), anticuerpos anticardiolipina (aCL) o anticuerpos anti- $\beta_2$  glicoproteína I ( $\beta_2$  GPI). En el año 1992, Ronald A. Asherson describió una variante clínica muy agresiva de este síndrome, caracterizada por el desarrollo de múltiples manifestaciones trombóticas, de manera simultánea o en el transcurso de un período de tiempo muy corto. Se propuso entonces el término SAP catastrófico, y desde ese momento se le conoce por ese nombre<sup>1</sup>.

El SAP catastrófico se presenta en menos del 1% de pacientes con SAP; sin embargo, su elevada mortalidad - entre 30% y 50% - y su complejo cuadro clínico, justifican un abordaje diferencial del resto de las variantes clásicas del SAP.

La rara ocurrencia de esta forma de SAP ha impedido su conocimiento e investigación desde que se describiera originalmente. Esto impulsó a la creación en el año 2000 de un registro internacional conocido como el “Registro CAPS”. Allí se reúnen todos los casos publicados en la literatura médica o reportados a los coordinadores del Registro, y en la actualidad cuenta con casi 600 casos de SAP catastrófico (disponibles en internet a través de: <https://ontocrf.grupocostaisa.com/en/web/caps/home>)<sup>1</sup>. Gran parte de nuestros actuales conocimientos sobre esta condición se derivan de los datos extraídos de los casos incluidos en el Registro. Esto ha permitido mejorar la definición de sus manifestaciones clínicas y presentar sugerencias sobre abordajes terapéuticos.

## **PATOGENESIS**

Los mecanismos fisiopatológicos del SAP catastrófico se desconocen. La razón por la cual algunos pacientes con aPL no desarrollan trombosis, en tanto que otros desarrollan un solo evento trombotico, mientras otros desarrollan múltiples oclusiones vasculares que afectan principalmente los pequeños vasos en un corto tiempo y en múltiples sitios, sigue siendo tema de investigación.<sup>2</sup>

Para explicar estos hallazgos se sugirió la hipótesis de los dos hits, de acuerdo con la cual un paciente con riesgo de mayor susceptibilidad (primer hit) puede desarrollar un evento trombotico al exponerse a un desencadenante (segundo hit). Por lo tanto, se requiere de un factor desencadenante para que se desarrolle el evento clínico. Este “segundo hit” sería otra condición trombotica que aumente el riesgo de formación de coágulos. Una de las características más destacadas del SAP catastrófico es la asociación con un factor

desencadenante en más del 50% de los casos.<sup>1</sup> Las infecciones, cirugías y neoplasias se han relacionado con el desarrollo del SAP catastrófico.<sup>3</sup>

La presentación clínica de un SAP pareciera estar regida por dos procesos fisiopatológicos que se presentan de manera simultánea. Primero, la trombosis multiorgánica que lleva a disfunción multiorgánica; y segundo, la inflamación posterior producida por la falta de irrigación sanguínea. En realidad, la presentación del SAP catastrófico es similar a la sepsis severa, en la cual se produce una respuesta inflamatoria sistémica con compromiso multiorgánico. Además, prácticamente todos los pacientes con sepsis presentan anomalías de la coagulación.<sup>4,5</sup> Estas anomalías van desde una sutil activación de la coagulación, solo detectable mediante técnicas sensibles, hasta una activación de la coagulación casi subclínica más fuerte, evidente por una pequeña disminución del recuento plaquetario y prolongación de los tiempos de coagulación, hasta coagulación intravascular diseminada fulminante, caracterizada por microtrombosis generalizada y sangrado profuso.<sup>4</sup> Se ha dicho que el compromiso multiorgánico de la trombosis que se presenta en la SAP catastrófica, promueve una tormenta de citocinas que genera un estado inflamatorio similar a la respuesta inflamatoria sistémica en el shock séptico. Adicionalmente, las citocinas proinflamatorias juegan un papel clave en el desarrollo del efecto procoagulante, al inducir la expresión del factor tisular sobre las células mononucleares y las células endoteliales, probablemente aumentando el riesgo de una nueva trombosis.

En 1998, Kitchens y colaboradores <sup>6</sup> presentaron el concepto de la tormenta trombótica: los pacientes desarrollan una nueva trombosis, luego de un primer evento trombótico. Se aventuró la hipótesis de que la causa del síndrome es la activación continua de eventos trombóticos frescos. <sup>7</sup> De acuerdo con esta teoría, el coágulo de sangre podría promover la formación de trombina y alterar la fibrinólisis al aumentar el inhibidor del activador

del plasminógeno tipo 1 (PAI). Esto determinaría el consumo de proteínas anticoagulantes naturales, tales como la proteína C y la antitrombina.

Más recientemente se ha propuesto un papel más destacado de la plaquetas. Se ha medido el recuento plaquetario antes y después de un evento catastrófico, observándose una marcada reducción justo antes del evento.<sup>8</sup> Conforme a esta hipótesis, un consumo / una deposición masiva de plaquetas en la microcirculación lleva a microtrombosis y posteriormente a falla orgánica. Por lo tanto, la reducción observada en la concentración de  $\alpha_2$ GPI durante la fase catastrófica, indica que las plaquetas y los anticuerpos  $\alpha_2$ GPI, y  $\alpha_2$ GPI, jugarían un papel protagónico en el SAP catastrófico.<sup>9</sup>

## CARACTERÍSTICAS CLÍNICAS

Las manifestaciones clínicas del SAP catastrófico se han clasificado en aquellas asociadas al órgano isquémico y aquellas que pudieran ser consecuencia de una respuesta inflamatoria sistémica desencadenada por la liberación de citocinas. El desarrollo de múltiples oclusiones por trombos con anemia microangiopática y trombocitopenia, son hallazgos típicos en pacientes con SAP catastrófico. No obstante, la presentación clínica suele ser difícil de diferenciar de otras causas de microangiopatía trombótica.

Clínicamente, el SAP catastrófico afecta más que todo a mujeres (70%) en la cuarta década de vida, con un promedio de edad de 39 años, aun cuando se han descrito casos de todas las edades, desde el nacimiento hasta la vejez.<sup>1</sup> La mitad de los pacientes con este síndrome no han presentado ninguna otra manifestación clínica de la enfermedad en el pasado. Un tercio de los pacientes cumplen con los criterios de clasificación de lupus eritematoso sistémico (LES) o tienen al menos algunas manifestaciones clínicas o inmunológicas de esta condición (enfermedad tipo lupus). Esta asociación es más frecuente en pacientes de edad madura, mientras que es menos frecuente en pacientes

pediátricos o añosos.<sup>1</sup> Sin embargo, se han descrito casos asociados a otras enfermedades autoinmunes.

El desarrollo del SAP catastrófico suele asociarse a un factor desencadenante. Se ha identificado un gatillo en más del 50% de los pacientes. En orden de frecuencia, las infecciones representan el 50% de los casos, los procedimientos quirúrgicos el 17%, las patologías malignas el 16%, el retiro de la anticoagulación o bajos niveles INR el 8%, las complicaciones obstétricas el 8%, medicamentos el 5% y exacerbaciones de LES el 3%. Las infecciones son el factor desencadenante más frecuente en edad pediátrica, y las patologías malignas son más frecuentes en la edad adulta.<sup>10</sup> La mayoría de las infecciones reportadas en pacientes con SAP catastrófico son producidas por bacterias gram-negativas. Estos agentes infecciosos pueden actuar co-señalizando con aPL la señal de receptores tipo toll, que induce el estado protrombótico y finalmente lleva a SAP catastrófico.

No resulta sorprendente que las neoplasias que, como se sabe están relacionadas con un estado trombofílico, sean el segundo factor desencadenante más frecuente en SAP catastrófico. Se han propuesto diferentes razones para explicar el mayor riesgo de trombosis en los pacientes con cáncer. Por ejemplo, estasis del flujo sanguíneo debido a invasión vascular, inmovilidad, activación de sustancias trombolíticas tanto por el tumor como por las células endoteliales, quimioterapia y dispositivos venosos centrales, como condiciones que pudieran explicar el aumento de la frecuencia de trombosis en estos pacientes.<sup>11,12</sup>

Clínicamente, el SAP catastrófico suele afectar los riñones (74% de los casos), seguido del cerebro (56%), los pulmones (55%), el corazón (53%) y la piel (45%).<sup>2</sup>

El compromiso renal se caracteriza por insuficiencia renal, casi siempre con proteinuria que pueda estar en el rango nefrótico y con hematuria e hipertensión. Frecuentemente los

pacientes con compromiso renal muestran signos de hemólisis, algunos cumplen con los criterios para púrpura trombótica y, cuando se realiza una biopsia renal, es común que haya señales de microangiopatía trombótica y en algunos casos, características de nefritis lúpica proliferativa.

El compromiso pulmonar afecta casi a un 60% de los casos, principalmente en forma de síndrome de dificultad respiratoria aguda y embolia pulmonar. Pocos pacientes desarrollan hemorragia pulmonar. Un porcentaje similar de pacientes desarrolla compromiso del sistema nervioso central, con encefalopatía, accidente cerebrovascular o convulsiones que algunas veces llevan al coma. Un pequeño número de pacientes desarrolla complicaciones cardíacas que se manifiestan como falla cardíaca e infarto al miocardio. Se ha encontrado enfermedad cardíaca valvular en un tercio de los pacientes con PAS catastrófico. La microangiopatía de la piel se presenta clínicamente como livedo reticular, pero algunos casos evolucionan a necrosis de la piel, úlceras o necrosis digital. Un tercio de los pacientes con SAP catastrófico desarrollan enfermedad vascular periférica, frecuentemente venosa, pero la mitad presenta trombosis de los vasos arteriales. Otros sistemas orgánicos comprometidos con menor frecuencia son el tracto gastrointestinal, el bazo, las glándulas suprarrenales, el páncreas, la retina y la médula.

## **MANIFESTACIONES DE LABORATORIO**

Las pruebas de laboratorio muestran trombocitopenia y algunas veces puede observarse la presencia de esquitocitos y signos de anemia hemolítica microangiopática. Con relación a aPL, AL estaba presente en el 83% de los episodios, el isotipo IgG de aCL en el 81%, IgM aCL en 51%, a<sup>2</sup>-GPI en 75% e IgM a<sup>2</sup>-GPI en 44%.

## **DIAGNÓSTICO Y DIAGNÓSTICO DIFERENCIAL**

Høldj q%wfr #lihuqfldgh#r v\$df lhqdv#r q#ur p er vlv# ~ols d#qr #v#



trombocitopénica trombótica (PTT), el síndrome urémico hemolítico (SUH), el SUH atípico, la coagulación intravascular diseminada (CID), trombocitopenia inducida por heparina (TIH), el síndrome de hemólisis - enzimas hepáticas elevadas - bajas plaquetas (HELLP), sepsis, y crisis renal esclerodérmica.<sup>13</sup>

Sduh#h#gldj q%wfr #glihuqfldo#gho#VDS#

Adicionalmente, es importante tratar cualquier factor desencadenante para romper el círculo vicioso. El tratamiento con antibióticos deberá administrarse si se sospecha la presencia de infección, puesto que éste pudiera ser el desencadenante.

En relación con tratamiento específico, actualmente se acepta que el mejor tratamiento de primera línea es la triple terapia que incluye anticoagulantes, corticoesteroides e intercambio plasmático y/o inmunoglobulinas endovenosas. Se ha reportado que este abordaje mejora la sobrevida de los pacientes en un 45%.<sup>14</sup>

La anticoagulación con heparina es la piedra angular del tratamiento para SAP catastrófico y la capacidad para romper los coágulos existentes es crítica para parar la evolución de la enfermedad. Más aún, su actividad anti-inflamatoria y su capacidad para inhibir la fijación de aPL a las células diana e inhibir la deposición del complemento, pudiera explicar su efectividad en pacientes con SAP catastrófico. La mayoría de los pacientes con SAP catastrófico se tratan inicialmente con heparina no fraccionada porque se puede revertir la anticoagulación en caso de ser necesario realizar algún procedimiento invasivo durante su permanencia en la UCI. Luego suele hacerse el cambio a heparina de bajo peso molecular (HBPM) y finalmente a antagonistas de la vitamina K.

Los esteroides se usan como antiinflamatorios por sus efectos benéficos para superar la respuesta sistémica inflamatoria producida por el tejido necrótico que se encuentra en los tejidos isquémicos. Además, se considera que los esteroides inhiben la translocación nuclear de las moléculas proinflamatorias producidas por aPL al fijarse a las células endoteliales y se ha demostrado que reducen los títulos de aPL. Los esteroides suelen administrarse en pulsos endovenosos de 500-1.000 mg/día, durante 1-3 días. Luego, la mayoría de los médicos continúan con el tratamiento con esteroides orales a dosis diarias, hasta que el paciente es dado de alta y luego se va disminuyendo la dosis hasta poder retirarla con seguridad.

El intercambio plasmático es una técnica que retira grandes cantidades de plasma y lo reemplaza por plasma fresco congelado o solución de albúmina. En el SAP catastrófico, este procedimiento se usa bajo la premisa de que el intercambio plasmático retira los aPL y las citocinas de la corriente plasmática, restaurando los anticoagulantes naturales con plasma fresco congelado. Este tratamiento está especialmente recomendado para pacientes con SAP catastrófico que presentan características iniciales de trombosis microangiopática. La Sociedad Americana de Aféresis recomienda el intercambio plasmático con un grado de evidencia 2C. Sin embargo, no existe consenso sobre el líquido de reemplazo de elección para estos pacientes, pero probablemente una combinación de plasma y albúmina pudiera ofrecer el equilibrio óptimo de riesgo – beneficio para minimizar los efectos secundarios potencialmente graves e indeseables y lograr el equilibrio necesario en términos de los factores de coagulación.

Los mecanismos de acción de las inmunoglobulinas endovenosas se desconocen. No obstante, se ha demostrado su beneficio en diversas condiciones inflamatorias. Una alta concentración de anticuerpos endovenosos pudiera dar lugar a una sobrecarga del receptor Fc de linfocitos, inhibiendo los autoanticuerpos patológicos que desencadenan la cascada inflamatoria y aumentan su depuración.

Las inmunoglobulinas endovenosas suelen ser bien toleradas; sin embargo, se han reportado eventos tromboembólicos y falla renal aguda luego de su administración. Se recomienda un estricto monitoreo para detectar tempranamente las complicaciones, en particular en casos en los cuales sea necesario esperar para el tratamiento anticoagulante y en pacientes añosos con hipertensión, diabetes o hipercolesterolemia, para quienes un esquema de infusión de 5 días pudiera ser más apropiado.

Se recomienda la ciclofosfamida en casos de SAP catastrófico severo, en pacientes con LES. La ciclofosfamida es un agente alquilante de mostaza nitrogenada que se fija al

ácido desoxirribonucleico en las células inmunes y produce la muerte celular. En caso de SAP catastrófico, la supresión del tejido linfoide puede reducir los títulos de aPL y los niveles de citocinas, logrando así desescalar la tormenta.

Se ha sugerido el uso de nuevos agentes terapéuticos tales como rituximab o eculizumab en casos refractarios, aun cuando estos deberán considerarse actualmente como terapias de segunda línea.<sup>15,16</sup>

## **PROGNÓSTICO**

La mortalidad del SAP catastrófico es alta. Los primeros estudios encontraron una tasa de mortalidad de alrededor del 50%, pero estudios más recientes han reportado una reducción de la mortalidad hasta el 36%.<sup>2,17,18</sup>

Más aún, para el momento del diagnóstico del SAP catastrófico, los pacientes con características asociadas a LES presentan un mayor riesgo de mortalidad, luego de ajustar por edad, sexo, compromiso orgánico y tratamiento.<sup>19</sup>

Las principales causas de mortalidad con las infecciones (20%), seguidas de accidente cerebrovascular (19%), falla cardíaca (17%) y falla multiorgánica (17%). Casi la mitad de los pacientes mueren por causa de eventos trombóticos, tales como ACV, o como resultado de manifestaciones inflamatorias sistémicas en respuesta al síndrome, tales como síndrome de dificultad respiratoria o encefalopatía.<sup>20</sup>

El SAP catastrófico suele presentarse como una enfermedad monofásica y la mayoría de los pacientes que sobreviven a un episodio catastrófico no recidivan y se mantienen asintomáticos con anticoagulación. Sin embargo, algunos pacientes desarrollan eventos posteriores asociados al SAP.<sup>21</sup> Algunos pocos pacientes padecen de eventos recurrentes de SAP catastrófico. Interesantemente, estos pacientes suelen presentar características de laboratorio de anemia hemolítica microangiopática.<sup>22</sup>

## Referencias

1. Rodríguez-Pintó I, Moitinho M, Santacreu I, et al. Catastrophic antiphospholipid syndrome (CAPS): Descriptive analysis of 500 patients from the International CAPS Registry. *Autoimmunity reviews* 2016;15(12):1120–4.
2. Ortega-Hernandez O-D, Agmon-Levin N, Blank M, Asherson RA, Shoenfeld Y. The physiopathology of the catastrophic antiphospholipid (Asherson's) syndrome: compelling evidence. *Journal of autoimmunity* 2009;32(1):1–6.
3. Rodríguez-Pintó I, Soriano A, Espinosa G, Shoenfeld Y, Cervera R. Catastrophic antiphospholipid syndrome: an orchestra with several musicians. *The Israel Medical Association journal: IMAJ* 2014;16(9):585–6.
4. Levi M. The coagulant response in sepsis. *Clinics in chest medicine* 2008;29(4):627–42, viii.
5. Levi M, Schultz M, van der Poll T. Sepsis and thrombosis. *Seminars in thrombosis and hemostasis* 2013;39(5):559–66.
6. Kitchens CS. Thrombotic storm: when thrombosis begets thrombosis. *The American journal of medicine* 1998;104(4):381–5.
7. Ortel TL, Kitchens CS, Erkan D, et al. Clinical causes and treatment of the thrombotic storm. *Expert review of hematology* 2012;5(6):653–9.
8. Joseph JE, Harrison P, Mackie IJ, Isenberg DA, Machin SJ. Increased circulating platelet-leucocyte complexes and platelet activation in patients with antiphospholipid syndrome, systemic lupus erythematosus and rheumatoid arthritis. *British Journal of Haematology* 2001;115(2):451–9.
9. Banzato A, Pengo V. Clinical relevance of  $\beta$ 2-glycoprotein-I plasma levels in Antiphospholipid Syndrome (APS). *Current Rheumatology Reports*. 2014;16(6).
10. Miesbach W, Asherson RA, Cervera R, et al. The role of malignancies in patients with catastrophic anti-phospholipid (Asherson's) syndrome. *Clinical rheumatology* 2007;26(12):2109–14.
11. Font C, Vidal L, Espinosa G, et al. Solid cancer, antiphospholipid antibodies, and venous thromboembolism . *Autoimmunity Reviews* 2011;10(4):222–7.
12. Vassallo J, Spector N, de Meis E, et al. Antiphospholipid antibodies in critically ill patients with cancer: a prospective cohort study. *Journal of critical care* 2014;29(4):533–8.
13. Cervera R, Rodríguez-Pintó I, Espinosa G. The diagnosis and clinical management of the catastrophic antiphospholipid syndrome: A comprehensive review. *Journal of Autoimmunity*. 2018; 92: 1-11
14. Rodríguez-Pintó I, Espinosa G, Erkan D, et al. The effect of triple therapy on the mortality of catastrophic anti-phospholipid syndrome patients. *Rheumatology* 2018;57(7):1264–70.

15. Berman H, Rodríguez-Pintó I, Cervera R, et al. Rituximab use in the catastrophic antiphospholipid syndrome: descriptive analysis of the CAPS registry patients receiving rituximab. *Autoimmunity reviews* 2013;12(11):1085–90.
16. Espinosa G, Berman H, Cervera R. Management of refractory cases of catastrophic antiphospholipid syndrome. *Autoimmunity reviews* 2011;10(11):664–8.
17. Bucciarelli S, Espinosa G, Cervera R, et al. Mortality in the catastrophic antiphospholipid syndrome: causes of death and prognostic factors in a series of 250 patients. *Arthritis and rheumatism* 2006;54(8):2568–76.
18. Espinosa G, Bucciarelli S, Asherson RA, Cervera R. Morbidity and mortality in the catastrophic antiphospholipid syndrome: pathophysiology, causes of death, and prognostic factors. *Seminars in thrombosis and hemostasis* 2008;34(3):290–4.
19. Bucciarelli S, Espinosa G, Cervera R, Erkan D, Gómez-Puerta JA, Ramos-Casals M, et al. Mortality in the catastrophic antiphospholipid syndrome: causes of death and prognostic factors in a series of 250 patients. *Arthritis Rheum.* 2006; 54:2568–76.
20. Cervera R, Tektonidou MG, Espinosa G, Cabral AR, González EB, Erkan D. et al. Task force on catastrophic antiphospholipid syndrome (APS) and non-criteria aps manifestations (I): Catastrophic APS, APS nephropathy and heart valve lesions. *Lupus* 2011; 20:165–173.
21. Erkan D, Asherson RA, Espinosa G, et al. Long-term outcome of catastrophic antiphospholipid syndrome survivors. *Annals of the rheumatic diseases* 2003;62(6):530–3.
22. Espinosa G, Rodríguez-Pintó I, Gomez-Puerta JA, Pons-Estel G, Cervera R. Relapsing Catastrophic Antiphospholipid Syndrome Potential Role of Microangiopathic Hemolytic Anemia in Disease Relapses. *Seminars in Arthritis and Rheumatism* 2013; 42:417–23.
